# Supplementary material for: Novel violet emitting material synthesized by stepwise chemical reactions
Source: Royal Society of Chemistry journal article supplement (doi:10.1039/c4tc00456f), 2014-01-01
Supplement: c4tc00456f1.pdf [file c4tc00456f1.pdf]

## Supporting Information for:

# Novel Violet Emitting Material Synthesized by Stepwise Chemical Reactions

Xiangyang Tang,<sup>a</sup> Liang Yao,<sup>a</sup> He Liu,<sup>a</sup> Fangzhong Shen,<sup>a</sup> Shitong Zhang,<sup>a</sup> Yunan Zhang,<sup>a</sup> Huanhuan Zhang,<sup>a</sup> Ping Lu,<sup>\*a</sup> and Yuguang Ma<sup>a</sup>

State Key Laboratory of Supramolecular Structure and Materials, Jilin University  
2699 Qianjin Avenue, Changchun, 130012 (P. R. China) Corresponding Author, E-mail: [lup@jlu.edu.cn](mailto:lup@jlu.edu.cn).

## Contents

|                                                                                                                                                                                                                                                                    |   |
|--------------------------------------------------------------------------------------------------------------------------------------------------------------------------------------------------------------------------------------------------------------------|---|
| <b>1. Structural Characterization</b> .....                                                                                                                                                                                                                        | 3 |
| <b>Figure S1</b> <sup>1</sup> H NMR spectra of the bipolar molecule CzPySiSF. ....                                                                                                                                                                                 | 3 |
| <b>2. Morphology Properties</b> .....                                                                                                                                                                                                                              | 3 |
| <b>Figure S2</b> AFM images of (a) CzSiSF, (b) PySiSF and (c) CzPySiSF. ....                                                                                                                                                                                       | 3 |
| <b>3. Photophysical Properties</b> .....                                                                                                                                                                                                                           | 3 |
| <b>Figure S3</b> The PL spectra of CzPh in THF (10 <sup>-5</sup> M) and in film.....                                                                                                                                                                               | 3 |
| <b>Figure S4</b> The relative intensity of emission spectra of CzSiCz, CzSiSF and CzPySiSF in THF for fluorescence quantum efficiency measurement. Inset: chemical structure of CzSiCz. ....                                                                       | 4 |
| <b>Table S1</b> The fluorescence quantum efficiency measurement data of CzSiCz, CzSiSF and CzPySiSF.....                                                                                                                                                           | 4 |
| <b>Figure S5</b> The PL spectra of CzPySiSF in different solvents (10 <sup>-5</sup> M). ....                                                                                                                                                                       | 4 |
| <b>4. Electroluminescence Properties</b> .....                                                                                                                                                                                                                     | 4 |
| <b>Figure S6</b> The EL spectra of (a) CzSiSF and (b) PySiSF in the device structure of ITO / PEDOT:PSS (40 nm) / NPB (80 nm) / TCTA (10 nm) / Emitting-layer (CzSiSF or PySiSF) (30 nm) / TPBi (30 nm) / LiF (0.5 nm) / Al (100 nm). ....                         | 5 |
| <b>Figure S7</b> The normalized EL spectra of CzPySiSF at different voltages from 6 V to 10 V. The device structure is: ITO / PEDOT:PSS (40 nm) / NPB (80 nm) / TCTA (10 nm) / Emitting-layer (CzPySiSF) (30 nm) / TPBi (30 nm) / LiF (0.5 nm) / Al (100 nm). .... | 5 |
| <b>Figure S8</b> The normalized EL spectra of controlled device without emitting layer. The device structure is: ITO / PEDOT:PSS (40 nm) / NPB (80 nm) / TCTA (10 nm) / TPBi (30 nm) / LiF (0.5 nm) / Al (100 nm). ....                                            | 5 |
| <b>Figure S9</b> The energy level diagram of device. ....                                                                                                                                                                                                          | 6 |

## 1. Structural Characterization

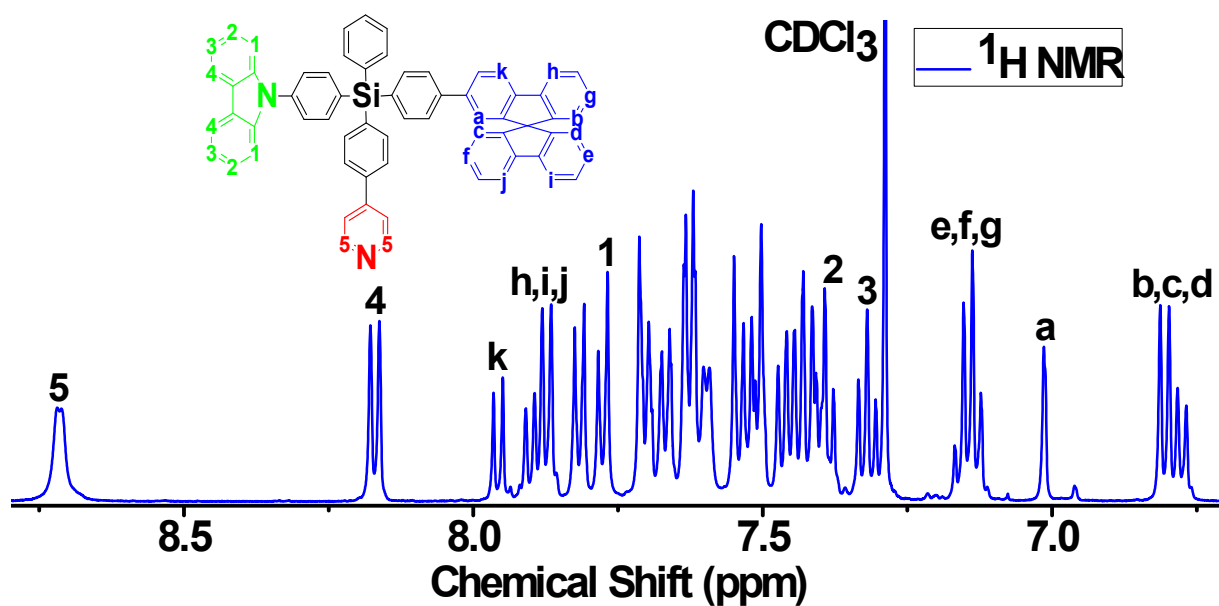

Figure S1  $^1\text{H}$  NMR spectra of the bipolar molecule CzPySiSF.

## 2. Morphology Properties

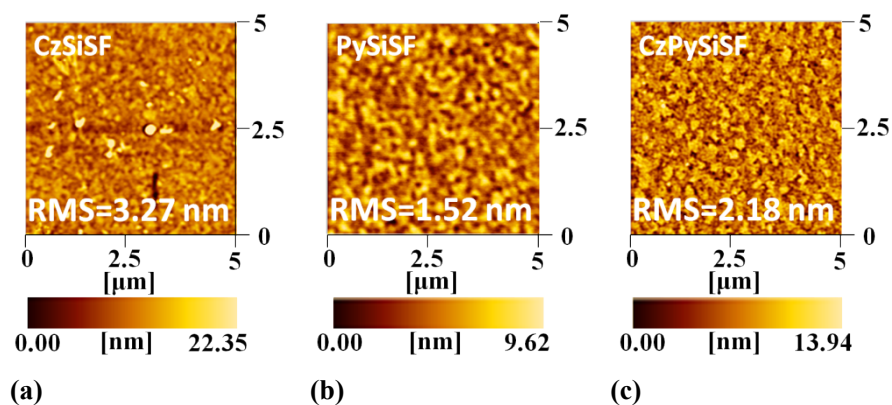

Figure S2 AFM images of (a) CzSiSF, (b) PySiSF and (c) CzPySiSF.

## 3. Photophysical Properties

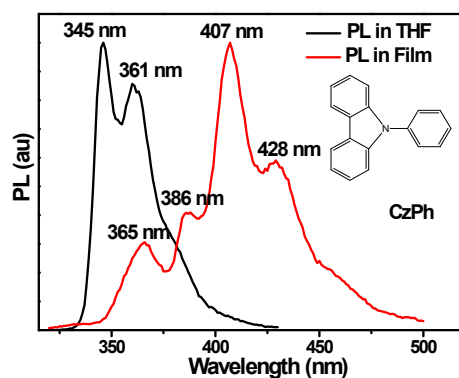

**Figure S3** The PL spectra of CzPh in THF ( $10^{-5}$  M) and in film.

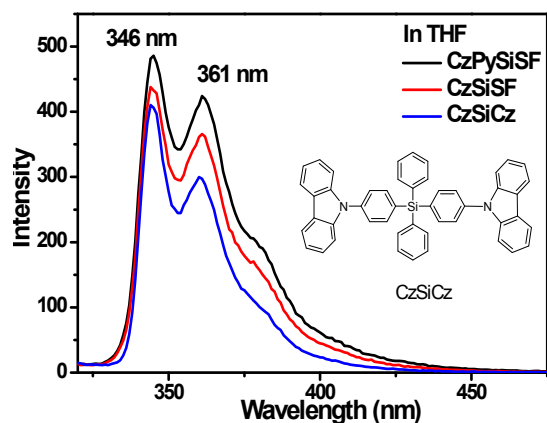

**Figure S4** The relative intensity of emission spectra of CzSiCz, CzSiSF and CzPySiSF in THF for fluorescence quantum efficiency measurement. Inset: chemical structure of CzSiCz.

**Table S1** The fluorescence quantum efficiency measurement data of CzSiCz, CzSiSF and CzPySiSF.

| Compound | D         | A       | Q     |
|----------|-----------|---------|-------|
| CzSiCz   | 12182.726 | 0.09685 | q     |
| CzSiSF   | 15667.161 | 0.08034 | 1.55q |
| CzPySiSF | 18648.471 | 0.09816 | 1.51q |

Abbreviations: A= the value of absorbance; D= the area of emission spectra; Q= fluorescence quantum efficiency.

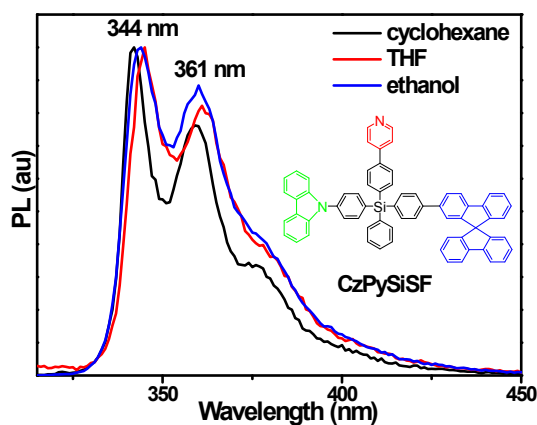

**Figure S5** The PL spectra of CzPySiSF in different solvents ( $10^{-5}$  M).

#### 4. Electroluminescence Properties

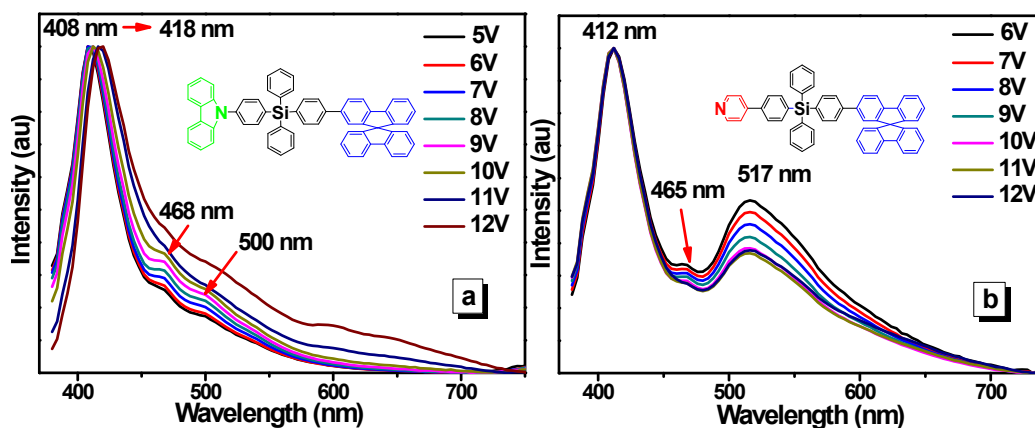

**Figure S6** The EL spectra of (a) CzSiSF and (b) PySiSF in the device structure of ITO / PEDOT:PSS (40 nm) / NPB (80 nm) / TCTA (10 nm) / Emitting-layer (CzSiSF or PySiSF) (30 nm) / TPBi (30 nm) / LiF (0.5 nm) / Al (100 nm).

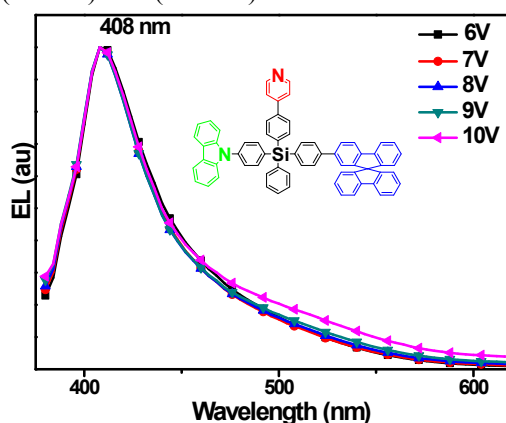

**Figure S7** The normalized EL spectra of CzPySiSF at different voltages form 6 V to 10 V. The device structure is: ITO / PEDOT:PSS (40 nm) / NPB (80 nm) / TCTA (10 nm) / Emitting-layer (CzPySiSF) (30 nm) / TPBi (30 nm) / LiF (0.5 nm) / Al (100 nm).

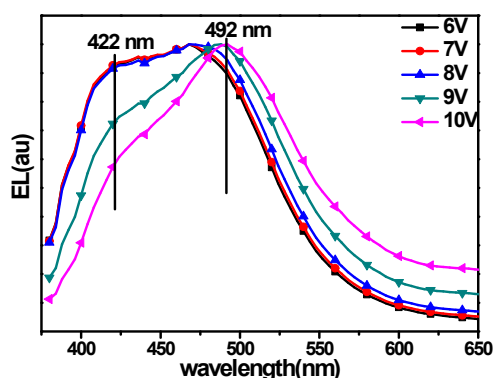

**Figure S8** The normalized EL spectra of controlled device without emitting layer. The device structure is: ITO / PEDOT:PSS (40 nm) / NPB (80 nm) / TCTA (10 nm) / TPBi (30 nm) / LiF (0.5 nm) / Al (100 nm).

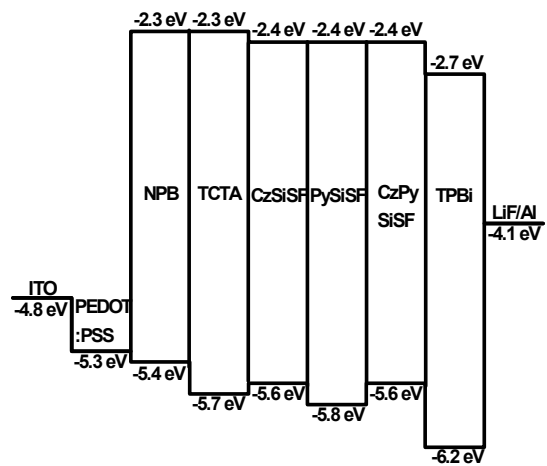

**Figure S9** The energy level diagram of device.
